# Supplementary material for: The episodic resurgence of highly pathogenic avian influenza H5 virus
Source: bioRxiv or medRxiv preprint supplement (doi:10.1101/2022.12.18.520670), 2022-12-18
Supplement: Supplementary file [file media-1.pdf]

### H5Nx wild bird outbreaks, 2016–2017

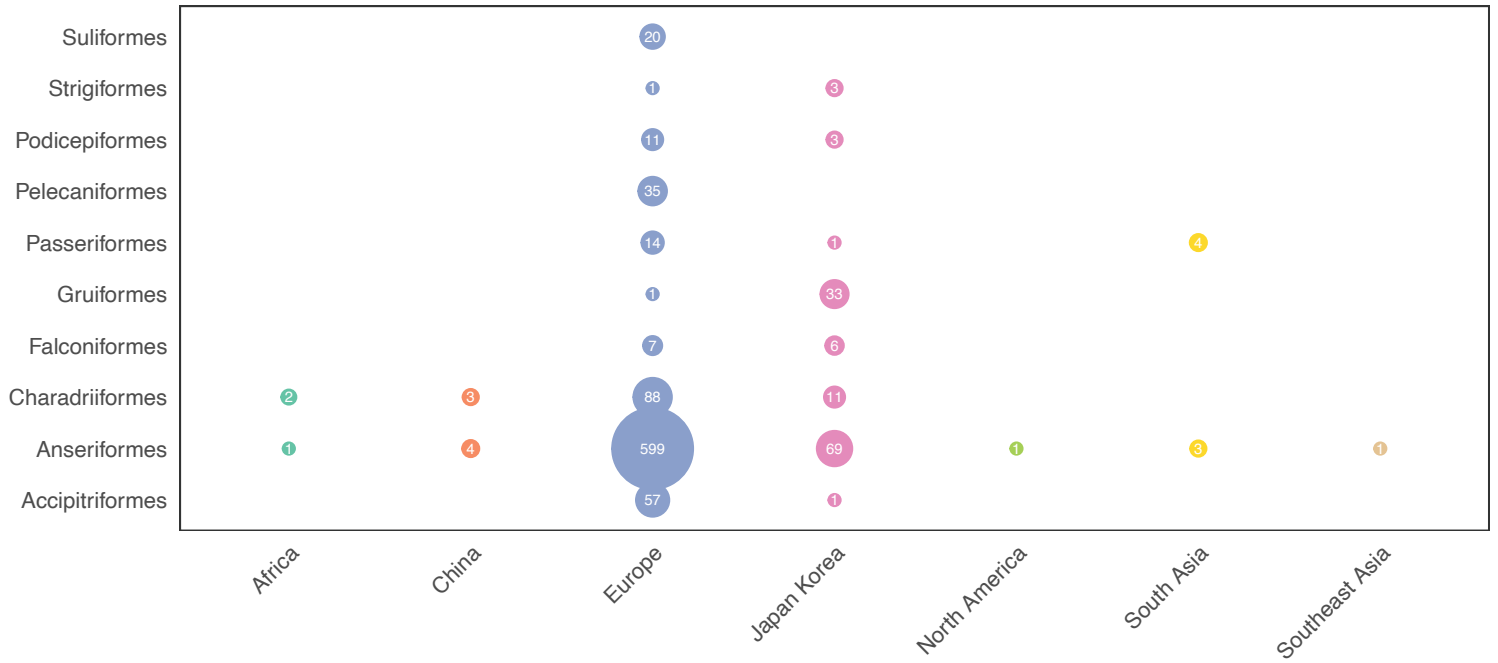

### H5Nx wild bird outbreaks, 2021–2022

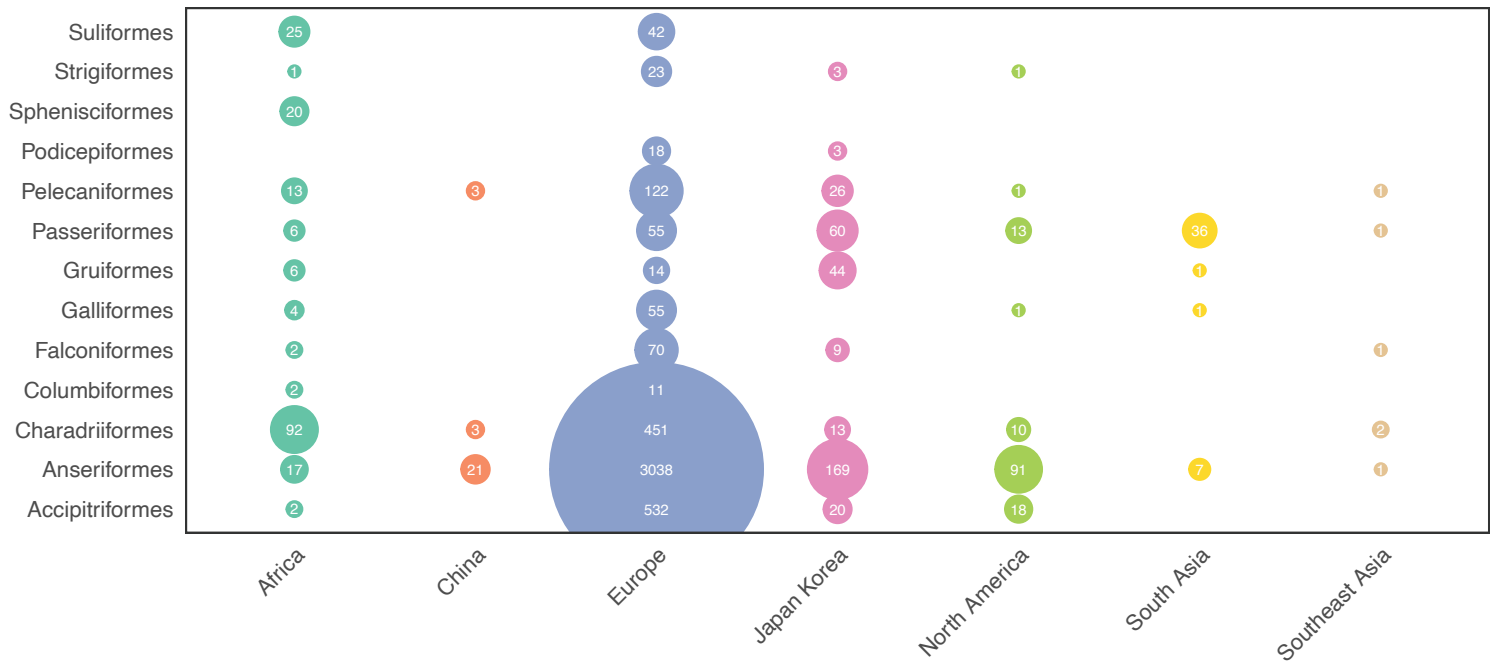

Supplementary fig. 1. Comparison of affected wild bird species in H5Nx outbreaks between 2016-2017 and 2021-2022.
