# Supplementary material for: The episodic resurgence of highly pathogenic avian influenza H5 virus
Source: bioRxiv or medRxiv preprint supplement (doi:10.1101/2022.12.18.520670), 2022-12-18
Supplement: Supplementary file [file media-4.pdf]

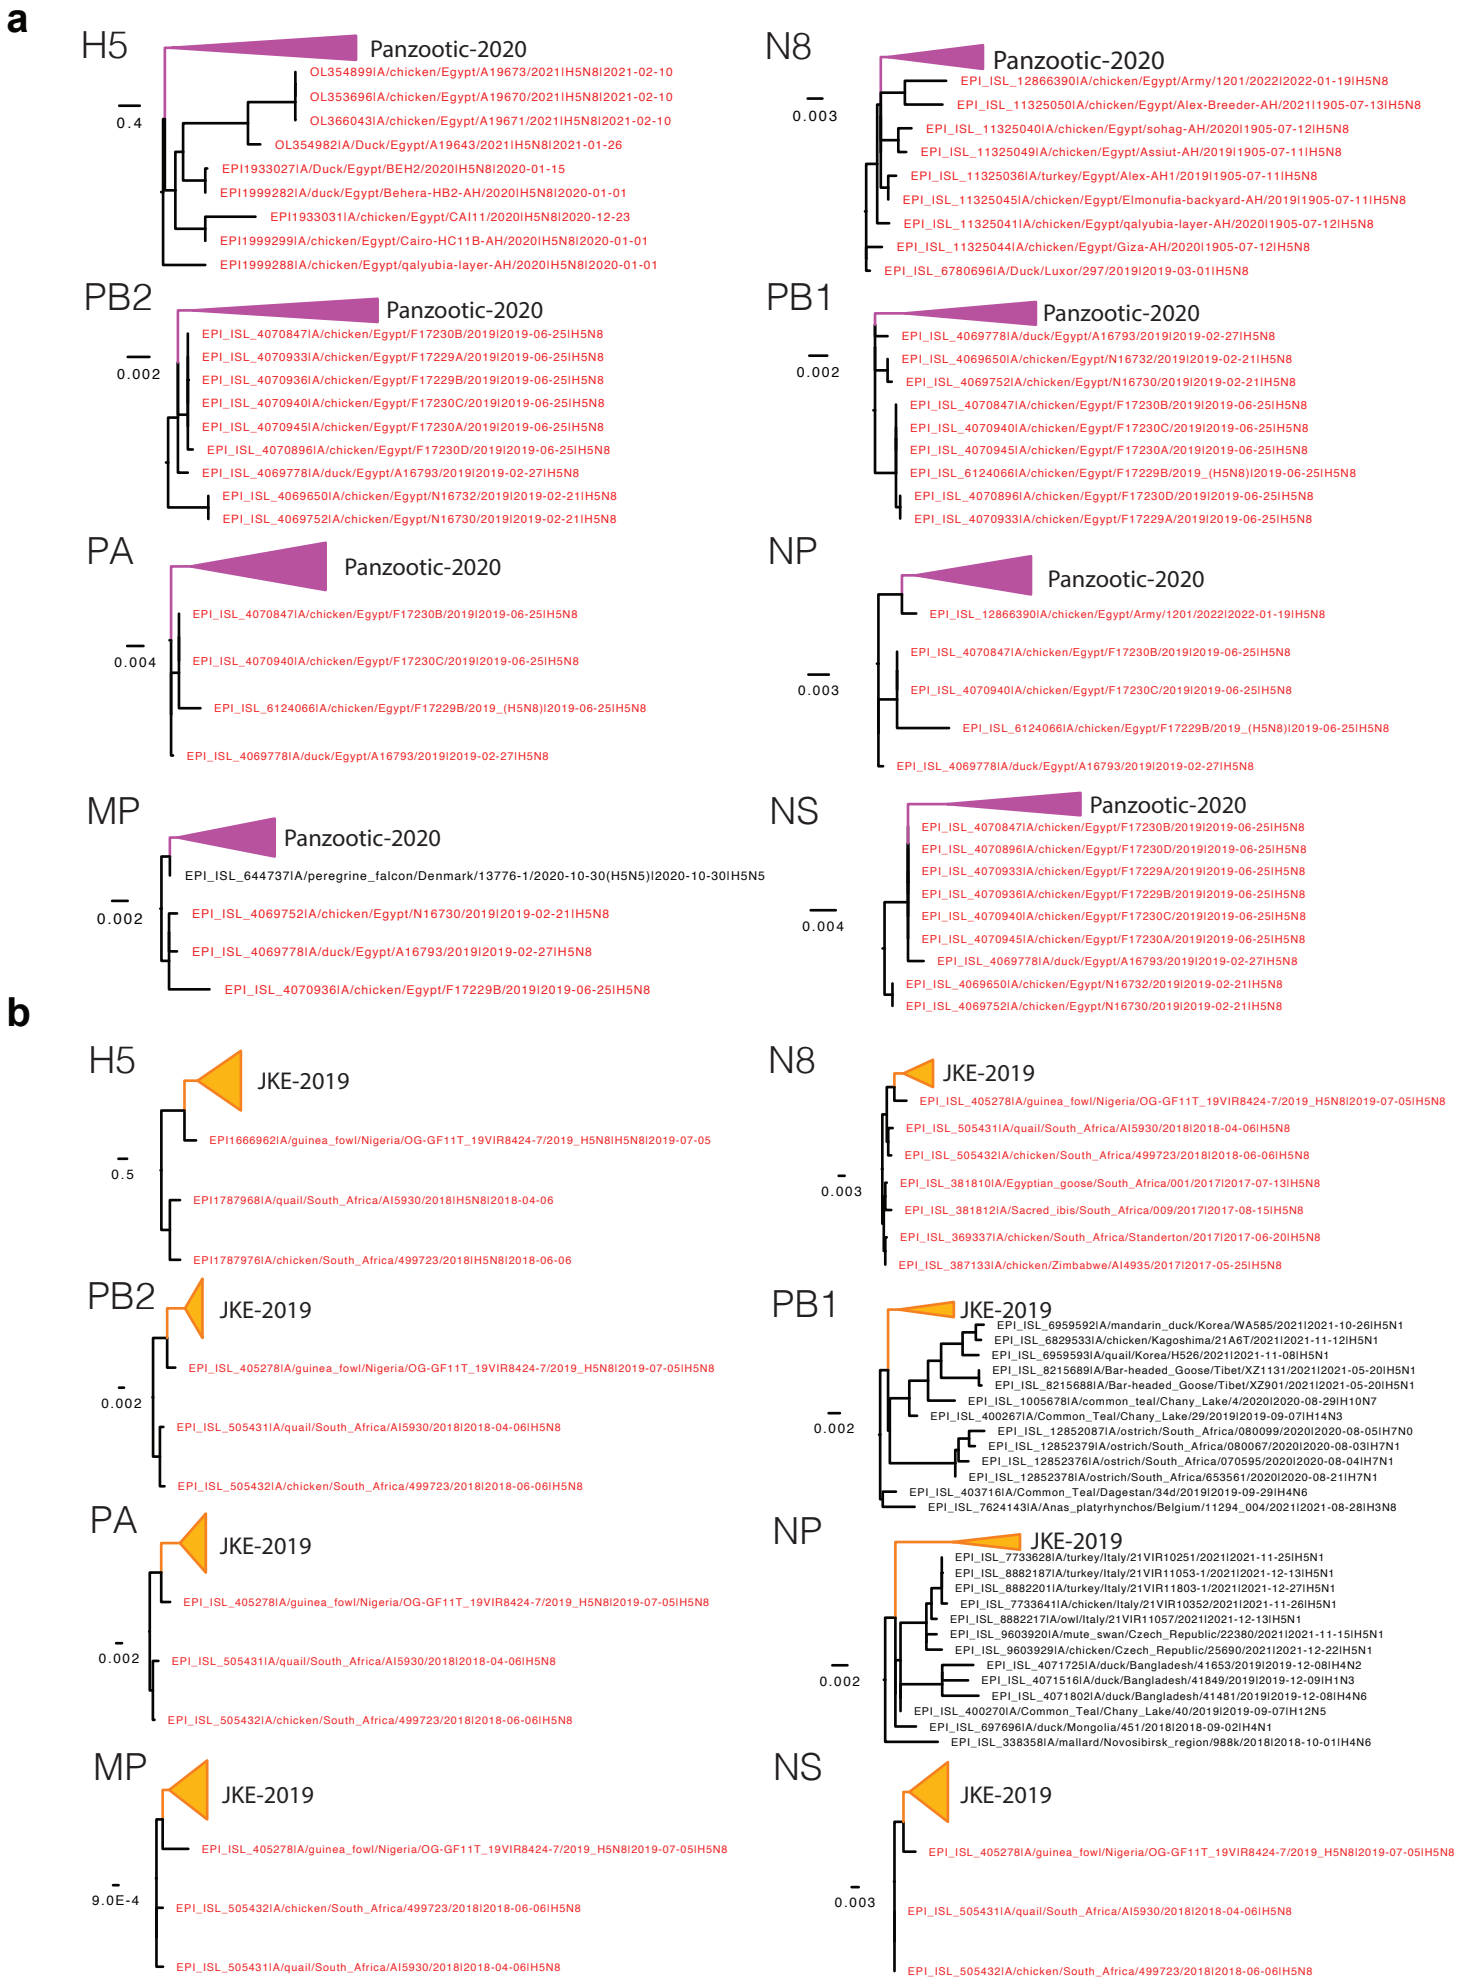

Supplementary fig. 4. Evolutionary relationships of Panzootic-2020 and JKE-2019 lineage. Maximum likelihood tree of Panzootic-2020 (a) and JKE-2019 (b) for eight segments. Samples collected in Africa are high-lighted in red.
