# Supplementary material for: The episodic resurgence of highly pathogenic avian influenza H5 virus
Source: bioRxiv or medRxiv preprint supplement (doi:10.1101/2022.12.18.520670), 2022-12-18
Supplement: Supplementary file [file media-5.pdf]

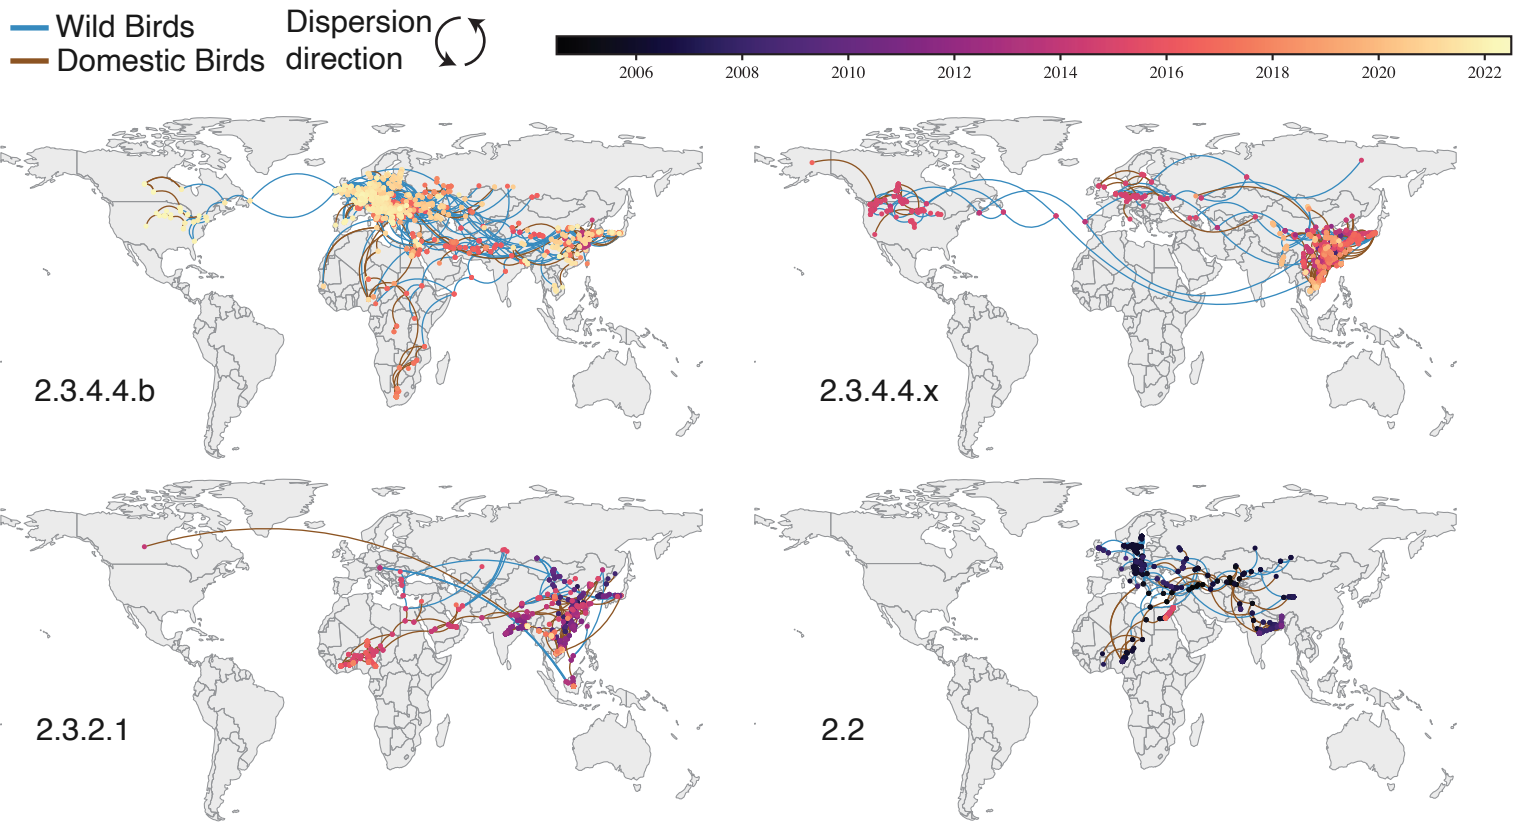

Supplementary fig. 5. Dynamics of HPAI H5 transmission lineages in clades 2.3.4.4.b, 2.3.4.4.x, 2.3.2.1 and 2.2. Virus lineage movements inferred by continuous phylogeographic analysis for each clade.
