# Supplementary material for: The episodic resurgence of highly pathogenic avian influenza H5 virus
Source: bioRxiv or medRxiv preprint supplement (doi:10.1101/2022.12.18.520670), 2022-12-18
Supplement: Supplementary file [file media-8.pdf]

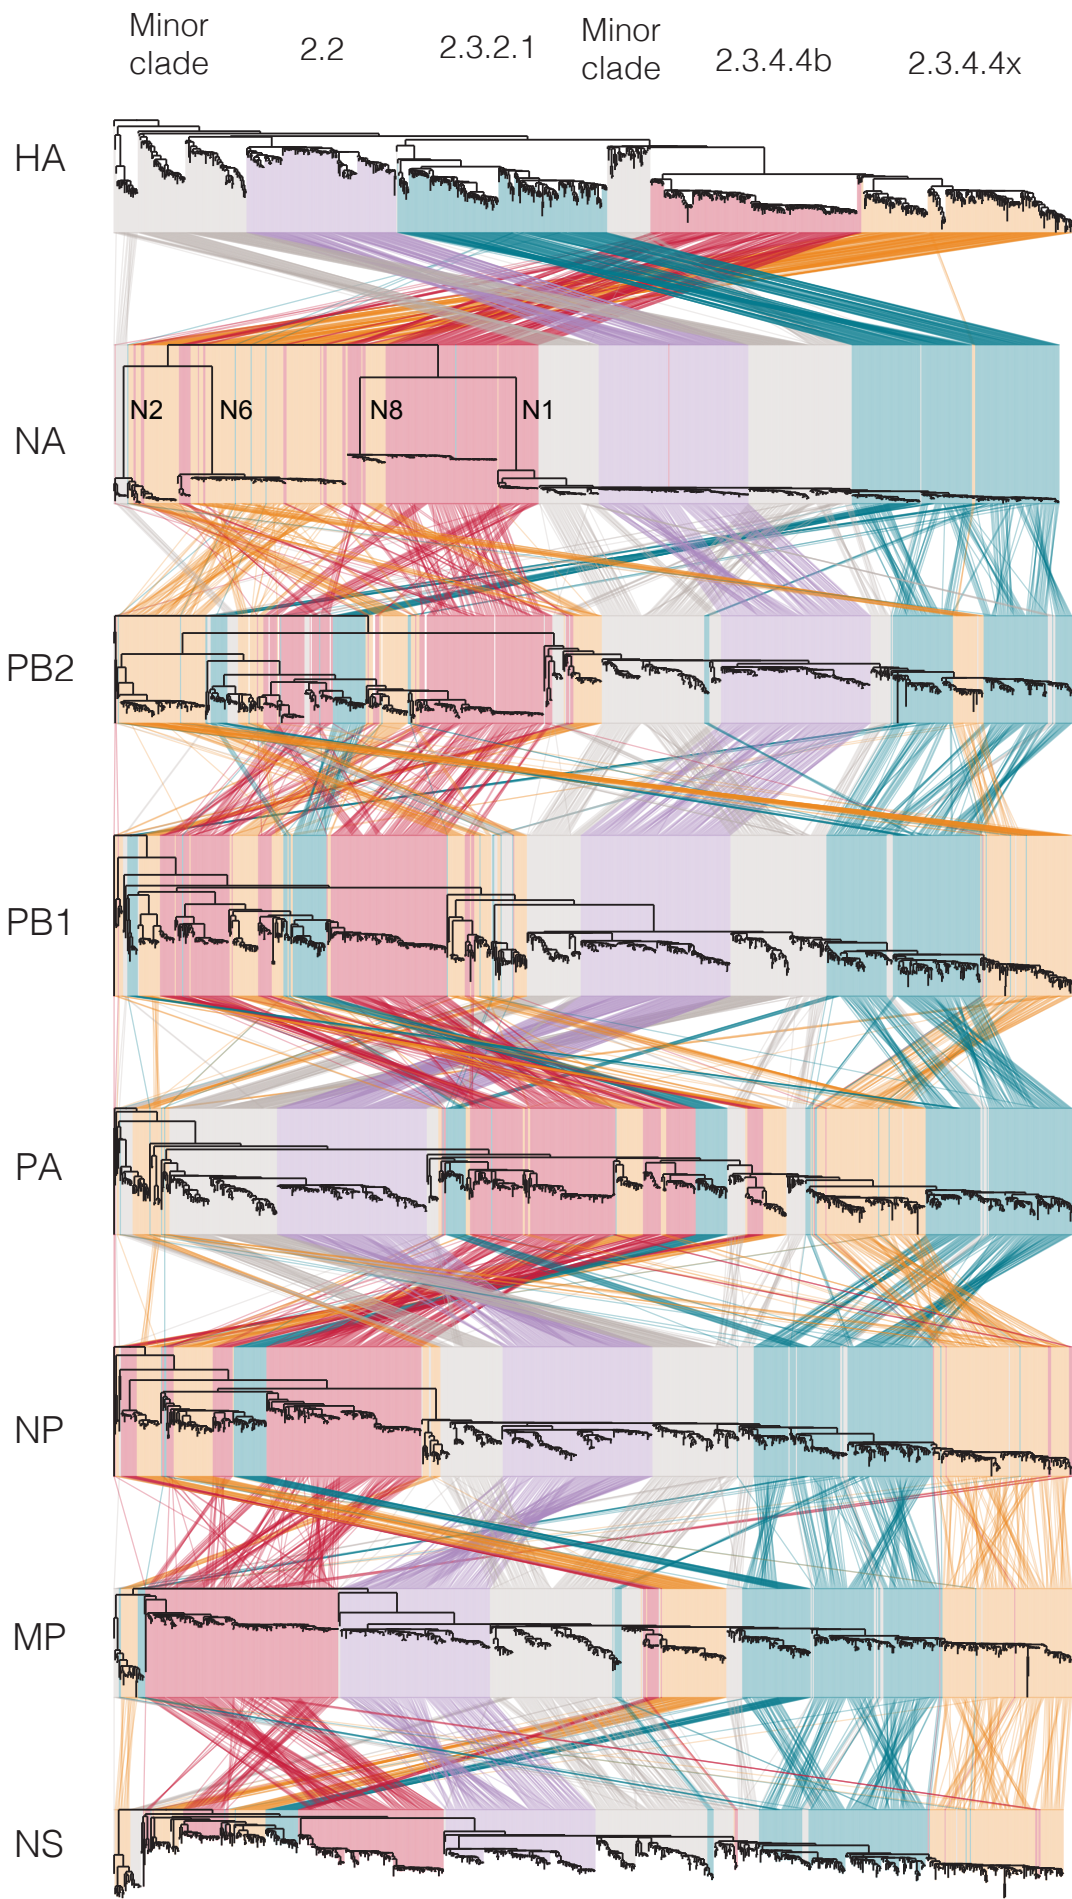

Supplementary fig. 8. Tanglegram of HPAI H5 virus reassortment. Coloured lines connect each virus across all eight gene, showing incongruence between and within major clades.
